# Supplementary material for: Higher Total Cholesterol Concentration May Be Associated with Better Cognitive Performance among Elderly Females
Source: MDPI journal article supplement (doi:10.3390/nu14194198), 2022-10-09
Supplement: s1 [file s1]

**Supplement Table S3 Missing Data of Variables for table 2**

| Variables                           | Missing (%) |
|-------------------------------------|-------------|
| Body mass index                     | 13 (0.99)   |
| Diabetes                            | 1 (0.076)   |
| Had at least 12 alcohol drinks/year | 17 (1.3)    |
| Hypertension                        | 2 (0.15)    |
| Material status                     | 1 (0.076)   |
| Smoking status                      | 1 (0.076)   |
