# Supplementary material for: Higher Total Cholesterol Concentration May Be Associated with Better Cognitive Performance among Elderly Females
Source: MDPI journal article supplement (doi:10.3390/nu14194198), 2022-10-09
Supplement: s1 [file s1]

**Supplement Table S1** Characteristics of the study population after weighting

| Cognitive Performance                         | Animal Fluency |           |                | Digit Symbol Substitution Test |           |                | CERAD     |           |                | Global Performance |           |                |
|-----------------------------------------------|----------------|-----------|----------------|--------------------------------|-----------|----------------|-----------|-----------|----------------|--------------------|-----------|----------------|
|                                               | Normal         | Low       | <i>P</i> value | Normal                         | Low       | <i>P</i> value | Normal    | Low       | <i>P</i> value | Normal             | Low       | <i>P</i> value |
| <b>Number of subjects</b>                     | 20320377.      | 5313175.0 |                | 21740932.                      | 3892620.0 |                | 19615677. | 6017875.0 |                | 21437873.          | 4195679.0 |                |
| <b>(%)<sup>1</sup></b>                        | 00             | 0         |                | 00                             | 0         |                | 00        | 0         |                | 00                 | 0         |                |
|                                               | (79.27%)       | (20.73%)  |                | (84.81%)                       | (15.19%)  |                | (76.52%)  | (23.48%)  |                | (83.63%)           | (16.37%)  |                |
| <b>Age in years at screening <sup>2</sup></b> | 68.88          | 70.84     | <0.001         | 68.96                          | 71.13     | <0.001         | 68.89     | 70.58     | 0.003          | 68.92              | 71.17     | <0.001         |
| <b>Age (%) <sup>1</sup></b>                   | (6.61)         | (6.71)    |                | (6.63)                         | (6.62)    |                | (6.63)    | (6.66)    |                | (6.66)             | (6.45)    |                |
|                                               |                |           | 0.001          |                                |           | 0.002          |           |           | 0.026          |                    |           | 0.007          |
|                                               | 11761769.      | 2450781.3 |                | 12416592.                      | 1795958.1 |                | 11339238. | 2873312.5 |                | 12247011.          | 1965539.7 |                |
| 60–70 years                                   | 53             | 3         |                | 67                             | 9         |                | 31        | 5         |                | 11                 | 5         |                |
|                                               | (57.88%)       | (46.13%)  |                | (57.11%)                       | (46.14%)  |                | (57.81%)  | (47.75%)  |                | (57.13%)           | (46.85%)  |                |
|                                               | 5852504.3      | 1719377.9 |                | 6301163.3                      | 1270719.0 |                | 5419408.2 | 2152474.1 |                | 6207114.9          | 1364767.4 |                |
| 70–80 years                                   | 9              | 9         |                | 3                              | 6         |                | 6         | 2         |                | 2                  | 6         |                |
|                                               | (28.80%)       | (32.36%)  |                | (28.98%)                       | (32.64%)  |                | (27.63%)  | (35.77%)  |                | (28.95%)           | (32.53%)  |                |
|                                               | 2706102.8      | 1143015.8 |                | 3023176.0                      | 825942.62 |                | 2857030.5 | 992088.09 |                | 2983747.1          | 865371.47 |                |
| ≥80 years                                     | 0              | 4         |                | 2                              | (21.22%)  |                | 4         | (16.49%)  |                | 6                  | (20.63%)  |                |
|                                               | (13.32%)       | (21.51%)  |                | (13.91%)                       |           |                | (14.57%)  |           |                | (13.92%)           |           |                |
| <b>Race (%) <sup>1</sup></b>                  |                |           | <0.001         |                                |           | <0.001         |           |           | 0.005          |                    |           | <0.001         |
|                                               |                |           |                |                                |           |                |           |           |                |                    |           |                |
| Mexican American                              | 555433.71      | 274866.06 |                | 415900.19                      | 414399.58 |                | 522313.64 | 307986.14 |                | 484040.62          | 346259.15 |                |
|                                               | (2.73%)        | (5.17%)   |                | (1.91%)                        | (10.65%)  |                | (2.66%)   | (5.12%)   |                | (2.26%)            | (8.25%)   |                |
| Other Hispanic                                | 593292.15      | 415813.53 |                | 521746.44                      | 487359.25 |                | 573835.95 | 435269.74 |                | 542337.31          | 466768.37 |                |
|                                               | (2.92%)        | (7.83%)   |                | (2.40%)                        | (12.52%)  |                | (2.93%)   | (7.23%)   |                | (2.53%)            | (11.12%)  |                |
|                                               | 17191287.      | 3284767.2 |                | 18575892.                      | 1900161.8 |                | 16133790. | 4342264.4 |                | 18138218.          | 2337836.3 |                |
| Non-Hispanic White                            | 56             | 2         |                | 98                             | 0         |                | 36        | 2         |                | 40                 | 8         |                |
|                                               | (84.60%)       | (61.82%)  |                | (85.44%)                       | (48.81%)  |                | (82.25%)  | (72.16%)  |                | (84.61%)           | (55.72%)  |                |
| Non-Hispanic Black                            | 1221535.8      | 942140.03 |                | 1294262.3                      | 869413.47 |                | 1609621.4 | 554054.41 |                | 1360409.5          | 803266.27 |                |
|                                               | 0 (6.01%)      | (17.73%)  |                | 6 (5.95%)                      | (22.33%)  |                | 2 (8.21%) | (9.21%)   |                | 6 (6.35%)          | (19.15%)  |                |

|                                                            |                             |                            |        |                             |                            |        |                             |                            |        |                             |                            |        |
|------------------------------------------------------------|-----------------------------|----------------------------|--------|-----------------------------|----------------------------|--------|-----------------------------|----------------------------|--------|-----------------------------|----------------------------|--------|
| Other Race                                                 | 758827.49<br>(3.73%)        | 395588.32<br>(7.45%)       |        | 933130.05<br>(4.29%)        | 221285.76<br>(5.68%)       |        | 776115.75<br>(3.96%)        | 378300.06<br>(6.29%)       |        | 912867.31<br>(4.26%)        | 241548.51<br>(5.76%)       |        |
| <b>Ratio of family income<br/>to poverty</b> <sup>2</sup>  | 3.17<br>(1.58)              | 2.27<br>(1.48)             | <0.001 | 3.21<br>(1.55)              | 1.78<br>(1.28)             | <0.001 | 3.16<br>(1.58)              | 2.43<br>(1.54)             | <0.001 | 3.18<br>(1.56)              | 2.04<br>(1.46)             | <0.001 |
| (Missing)                                                  | 1226083                     | 544724                     |        | 1504131                     | 266676                     |        | 1453393                     | 317415                     |        | 1533677                     | 237131                     |        |
| <b>Poverty–income ratio<br/>(%)</b> <sup>1</sup>           |                             |                            | <0.001 |                             |                            | <0.001 |                             |                            | <0.001 |                             |                            | <0.001 |
| ≤0.99                                                      | 1483854.2<br>0 (7.77%)      | 969835.02<br>(20.34%)      |        | 1267264.0<br>2 (6.26%)      | 1186425.2<br>0<br>(32.72%) |        | 1361531.6<br>5 (7.50%)      | 1092157.5<br>7<br>(19.16%) |        | 1363234.5<br>6 (6.85%)      | 1090454.6<br>6<br>(27.55%) |        |
| ≥1                                                         | 17610439.<br>15<br>(92.23%) | 3798616.2<br>9<br>(79.66%) |        | 18969536.<br>62<br>(93.74%) | 2439518.8<br>2<br>(67.28%) |        | 16800752.<br>84<br>(92.50%) | 4608302.6<br>0<br>(80.84%) |        | 18540962.<br>11<br>(93.15%) | 2868093.3<br>3<br>(72.45%) |        |
| (Missing)                                                  | 1226083                     | 544724                     |        | 1504131                     | 266676                     |        | 1453393                     | 317415                     |        | 1533677                     | 237131                     |        |
| <b>Body mass index (%)</b> <sup>1</sup>                    |                             |                            | 0.3    |                             |                            | 0.8    |                             |                            | 0.6    |                             |                            | 0.9    |
| < 25 kg/m <sup>2</sup>                                     | 5787415.7<br>5<br>(28.59%)  | 1460882.0<br>4<br>(28.06%) |        | 6095775.9<br>2<br>(28.10%)  | 1152521.8<br>7<br>(30.63%) |        | 5613706.1<br>3<br>(28.78%)  | 1634591.6<br>5<br>(27.50%) |        | 6113208.6<br>2<br>(28.68%)  | 1135089.1<br>7<br>(27.46%) |        |
| 25-30 kg/m <sup>2</sup>                                    | 6833059.6<br>0<br>(33.75%)  | 1473368.2<br>6<br>(28.30%) |        | 7145749.8<br>4<br>(32.95%)  | 1160678.0<br>2<br>(30.85%) |        | 6486627.8<br>3<br>(33.25%)  | 1819800.0<br>3<br>(30.62%) |        | 6975457.3<br>1<br>(32.72%)  | 1330970.5<br>5<br>(32.20%) |        |
| ≥30 kg/m <sup>2</sup>                                      | 7625840.0<br>9<br>(37.67%)  | 2271751.0<br>5<br>(43.64%) |        | 8448292.1<br>5<br>(38.95%)  | 1449298.9<br>9<br>(38.52%) |        | 7408139.0<br>0<br>(37.97%)  | 2489452.1<br>4<br>(41.88%) |        | 8229648.2<br>4<br>(38.60%)  | 1667942.9<br>0<br>(40.35%) |        |
| (Missing)                                                  | 74061                       | 107174                     |        | 51114                       | 130121                     |        | 107204                      | 74031                      |        | 119559                      | 61676                      |        |
| <b>Body Mass Index<br/>(kg/m<sup>2</sup>)</b> <sup>2</sup> | 28.97<br>(6.44)             | 29.63<br>(7.09)            | 0.4    | 29.04<br>(6.47)             | 29.49<br>(7.17)            | 0.8    | 29.03<br>(6.65)             | 29.35<br>(6.35)            | 0.4    | 29.02<br>(6.53)             | 29.57<br>(6.84)            | 0.5    |
| (Missing)                                                  | 74061                       | 107174                     |        | 51114                       | 130121                     |        | 107204                      | 74031                      |        | 119559                      | 61676                      |        |

|                                                      |           |           |        |           |           |  |           |           |           |           |
|------------------------------------------------------|-----------|-----------|--------|-----------|-----------|--|-----------|-----------|-----------|-----------|
| Diabetes (%)                                         |           |           | 0.004  |           | <0.001    |  | <0.001    |           | <0.001    |           |
|                                                      | 16774330. | 3756613.4 |        | 17969603. | 2561340.8 |  | 16383738. | 4147205.5 | 17871106. | 2659837.7 |
| Without Diabetes                                     | 48        | 6         |        | 04        | 9         |  | 41        | 3         | 22        | 1         |
|                                                      | (82.55%)  | (70.81%)  |        | (82.65%)  | (65.93%)  |  | (83.56%)  | (68.91%)  | (83.39%)  | (63.39%)  |
|                                                      | 3546046.2 | 1548947.2 |        | 3771328.9 | 1323664.4 |  | 3224324.2 | 1870669.2 | 3559152.4 | 1535840.9 |
| With Diabetes                                        | 4         | 2         |        | 7         | 9         |  | 3         | 4         | 9         | 7         |
|                                                      | (17.45%)  | (29.19%)  |        | (17.35%)  | (34.07%)  |  | (16.44%)  | (31.09%)  | (16.61%)  | (36.61%)  |
| (Missing)                                            | 0         | 7614      |        | 0         | 7614      |  | 7614      | 0         | 7614      | 0         |
| Had at least 12 alcohol drinks/year (%) <sup>1</sup> |           |           | 0.003  |           | <0.001    |  | 0.015     |           | <0.001    |           |
|                                                      | 7005811.3 | 2514912.3 |        | 7387649.6 | 2133074.0 |  | 6811477.5 | 2709246.1 | 7329258.8 | 2191464.8 |
| No                                                   | 6         | 3         |        | 1         | 8         |  | 1         | 7         | 6         | 3         |
|                                                      | (34.97%)  | (47.57%)  |        | (34.31%)  | (56.30%)  |  | (35.17%)  | (45.51%)  | (34.57%)  | (53.24%)  |
|                                                      | 13027277. | 2771383.9 |        | 14142974. | 1655686.6 |  | 12555029. | 3243631.7 | 13874072. | 1924588.3 |
| Yes                                                  | 16        | 9         |        | 52        | 2         |  | 44        | 0         | 79        | 6         |
|                                                      | (65.03%)  | (52.43%)  |        | (65.69%)  | (43.70%)  |  | (64.83%)  | (54.49%)  | (65.43%)  | (46.76%)  |
| (Missing)                                            | 287288    | 26879     |        | 210308    | 103859    |  | 249170    | 64997     | 234542    | 79626     |
| Hypertension (%) <sup>1</sup>                        |           |           | <0.001 |           | <0.001    |  | 0.3       |           | <0.001    |           |
|                                                      | 8826155.8 | 1587208.7 |        | 9357312.9 | 1056051.5 |  | 8227340.2 | 2186024.2 | 9294951.2 | 1118413.2 |
| Without hypertension                                 | 3         | 0         |        | 4         | 9         |  | 7         | 5         | 6         | 6         |
|                                                      | (43.52%)  | (29.93%)  |        | (43.14%)  | (27.13%)  |  | (42.03%)  | (36.39%)  | (43.44%)  | (26.72%)  |
|                                                      | 11454528. | 3715751.0 |        | 12333711. | 2836568.2 |  | 11348644. | 3821635.0 | 12103229. | 3067049.9 |
| With hypertension                                    | 61        | 3         |        | 37        | 8         |  | 56        | 8         | 65        | 9         |
|                                                      | (56.48%)  | (70.07%)  |        | (56.86%)  | (72.87%)  |  | (57.97%)  | (63.61%)  | (56.56%)  | (73.28%)  |
| (Missing)                                            | 39692     | 10215     |        | 49908     | 0         |  | 39692     | 10215     | 39692     | 10215     |
| Material status (%) <sup>1</sup>                     |           |           | 0.006  |           | <0.001    |  | 0.022     |           | 0.002     |           |

|                                          |           |           |        |           |           |        |           |           |        |           |           |
|------------------------------------------|-----------|-----------|--------|-----------|-----------|--------|-----------|-----------|--------|-----------|-----------|
| Widowed/divorced/separated/never married | 8918967.6 | 2845521.3 |        | 9420321.5 | 2344167.4 |        | 8564993.1 | 3199495.8 |        | 9306923.3 | 2457565.6 |
|                                          | 5         | 3         |        | 2         | 6         |        | 1         | 6         |        | 7         | 1         |
|                                          | (43.89%)  | (53.63%)  |        | (43.34%)  | (60.22%)  |        | (43.68%)  | (53.17%)  |        | (43.43%)  | (58.57%)  |
| Married/living with partner              | 11401409. | 2460711.8 |        | 12313668. | 1548452.4 |        | 11043742. | 2818378.9 |        | 12124007. | 1738113.0 |
|                                          | 08        | 7         |        | 54        | 0         |        | 04        | 0         |        | 87        | 8         |
|                                          | (56.11%)  | (46.37%)  |        | (56.66%)  | (39.78%)  |        | (56.32%)  | (46.83%)  |        | (56.57%)  | (41.43%)  |
| (Missing)                                | 0         | 6942      |        | 6942      | 0         |        | 6942      | 0         |        | 6942      | 0         |
| <b>Smoking status (%) <sup>1</sup></b>   |           |           | 0.7    |           |           | 0.075  |           |           | 0.7    |           | 0.7       |
| Never                                    | 12000513. | 3314114.8 |        | 12856356. | 2458271.7 |        | 11796854. | 3517774.3 |        | 12744622. | 2570005.8 |
|                                          | 80        | 0         |        | 84        | 6         |        | 26        | 3         |        | 72        | 8         |
|                                          | (59.08%)  | (62.38%)  |        | (59.15%)  | (63.15%)  |        | (60.16%)  | (58.46%)  |        | (59.47%)  | (61.25%)  |
| Former                                   | 6254705.5 | 1527873.0 |        | 6850740.7 | 931837.87 |        | 5970465.3 | 1812113.2 |        | 6613490.9 | 1169087.7 |
|                                          | 7         | 4         |        | 4         |           |        | 9         | 2         |        | 1         | 0         |
|                                          | (30.79%)  | (28.76%)  |        | (31.52%)  | (23.94%)  |        | (30.45%)  | (30.11%)  |        | (30.86%)  | (27.86%)  |
| Current                                  | 2057674.3 | 471187.32 |        | 2026351.4 | 502510.24 |        | 1840874.4 | 687987.21 |        | 2072276.5 | 456585.11 |
|                                          | 8         |           |        | 6         |           |        | 9         |           |        | 9         |           |
|                                          | (10.13%)  | (8.87%)   |        | (9.32%)   | (12.91%)  |        | (9.39%)   | (11.43%)  |        | (9.67%)   | (10.88%)  |
| (Missing)                                | 7483      | 0         |        | 7483      | 0         |        | 7483      | 0         |        | 7483      | 0         |
| <b>Education level (%) <sup>1</sup></b>  |           |           | <0.001 |           |           | <0.001 |           |           | <0.001 |           | <0.001    |
| Below high school                        | 2405039.1 | 1681008.8 |        | 2264850.5 | 1821197.5 |        | 2340030.0 | 1746018.0 |        | 2259469.3 | 1826578.7 |
|                                          | 9         | 9         |        | 4         | 4         |        | 8         | 0         |        | 5         | 3         |
|                                          | (11.84%)  | (31.64%)  |        | (10.42%)  | (46.79%)  |        | (11.93%)  | (29.01%)  |        | (10.54%)  | (43.53%)  |
| High school                              | 4714639.6 | 1418453.6 |        | 5140075.5 | 993017.80 |        | 4537885.4 | 1595207.9 |        | 4918907.4 | 1214185.8 |
|                                          | 4         | 8         |        | 2         |           |        | 1         | 2         |        | 5         | 8         |
|                                          | (23.20%)  | (26.70%)  |        | (23.64%)  | (25.51%)  |        | (23.13%)  | (26.51%)  |        | (22.94%)  | (28.94%)  |
| Above high school                        | 13200697. | 2213712.5 |        | 14336005. | 1078404.5 |        | 12737761. | 2676648.8 |        | 14259496. | 1154914.0 |
|                                          | 89        | 9         |        | 95        | 2         |        | 62        | 6         |        | 40        | 8         |
|                                          | (64.96%)  | (41.66%)  |        | (65.94%)  | (27.70%)  |        | (64.94%)  | (44.48%)  |        | (66.52%)  | (27.53%)  |

|                                                   |                            |                            |        |                            |                            |        |                            |                            |       |                            |                            |        |
|---------------------------------------------------|----------------------------|----------------------------|--------|----------------------------|----------------------------|--------|----------------------------|----------------------------|-------|----------------------------|----------------------------|--------|
| <b>Total Cholesterol<br/>(mg/dL) <sup>2</sup></b> | 206.99<br>(40.44)          | 195.67<br>(42.45)          | <0.001 | 206.39<br>(40.28)          | 194.88<br>(44.27)          | <0.001 | 207.26<br>(40.52)          | 196.10<br>(41.91)          | 0.003 | 207.61<br>(40.50)          | 189.48<br>(40.90)          | <0.001 |
| <b>Total Cholesterol (%) <sup>1</sup></b>         |                            |                            | 0.012  |                            |                            | <0.001 |                            |                            | 0.003 |                            |                            | <0.001 |
|                                                   | 4096418.9                  | 1654111.3                  |        | 4449397.7                  | 1301132.5                  |        | 3898269.8                  | 1852260.4                  |       | 4232852.2                  | 1517677.9                  |        |
| < 174 mg/dL                                       | 0<br>(20.16%)              | 8<br>(31.13%)              |        | 3<br>(20.47%)              | 5<br>(33.43%)              |        | 5<br>(19.87%)              | 3<br>(30.78%)              |       | 9<br>(19.74%)              | 9<br>(36.17%)              |        |
| 174-201 mg/dL                                     | 5264620.8<br>8<br>(25.91%) | 1378810.1<br>1<br>(25.95%) |        | 5523581.2<br>2<br>(25.41%) | 1119849.7<br>7<br>(28.77%) |        | 4997238.8<br>2<br>(25.48%) | 1646192.1<br>7<br>(27.36%) |       | 5330610.8<br>5<br>(24.87%) | 1312820.1<br>4<br>(31.29%) |        |
| 201-229 mg/dL                                     | 5303208.2<br>9<br>(26.10%) | 1264566.7<br>9<br>(23.80%) |        | 5961871.7<br>2<br>(27.42%) | 605903.36<br>(15.57%)      |        | 5193694.0<br>1<br>(26.48%) | 1374081.0<br>7<br>(22.83%) |       | 5857104.4<br>1<br>(27.32%) | 710670.67<br>(16.94%)      |        |
| >229 mg/dL                                        | 5656128.6<br>6<br>(27.83%) | 1015686.8<br>7<br>(19.12%) |        | 5806081.3<br>5<br>(26.71%) | 865734.18<br>(22.24%)      |        | 5526474.4<br>3<br>(28.17%) | 1145341.1<br>0<br>(19.03%) |       | 6017305.6<br>5<br>(28.07%) | 654509.88<br>(15.60%)      |        |

CERAD(Consortium to Establish a Registry for Alzheimer's Disease); Data is number of subjects (percentage) or medians (interquartile ranges); <sup>1</sup> Chi-square test was used to compare the percentage between participants with and without low cognitive performance; <sup>2</sup> Wilcoxon rank sum test or Fisher's exact test was used to compare the mean±standard deviance values between participants with and without low cognitive performance.
