# Supplementary material for: Higher Total Cholesterol Concentration May Be Associated with Better Cognitive Performance among Elderly Females
Source: MDPI journal article supplement (doi:10.3390/nu14194198), 2022-10-09
Supplement: s1 [file s1]

**Supplement Table S2** Weighted odds ratios (95% confidence intervals) for four dimensions of cognitive performance across quartiles of total cholesterol in survey data

|         | CFDAST_SCORE         |                      |                      | CFDDS_SCORE          |                      |                      | CDEAR_SCORE          |                      |                      | z_score              |                      |                      |
|---------|----------------------|----------------------|----------------------|----------------------|----------------------|----------------------|----------------------|----------------------|----------------------|----------------------|----------------------|----------------------|
|         | Model-1              | Model-2              | Model-3              |
| < 174   | 1.00                 | 1.00                 | 1.00                 | 1.00                 | 1.00                 | 1.00                 | 1.00                 | 1.00                 | 1.00                 | 1.00                 | 1.00                 | 1.00                 |
| mg/dL   | (Ref.)               |
| 174-201 | 0.65                 | 0.74                 | 0.77                 | 0.69                 | 0.83                 | 0.92                 | 0.69*                | 0.78                 | 0.91                 | 0.69                 | 0.85                 | 0.99                 |
| mg/dL   | (95%CI<br>0.37-1.13) | (95%CI<br>0.40-1.34) | (95%CI<br>0.40-1.49) | (95%CI<br>0.42-1.15) | (95%CI<br>0.45-1.54) | (95%CI<br>0.47-1.77) | (95%CI<br>0.48-0.99) | (95%CI<br>0.53-1.15) | (95%CI<br>0.58-1.42) | (95%CI<br>0.44-1.06) | (95%CI<br>0.52-1.41) | (95%CI<br>0.56-1.74) |
| 201-229 | 0.59**               | 0.82                 | 0.90                 | 0.35***              | 0.40**               | 0.47*                | 0.56*                | 0.65                 | 0.77                 | 0.34***              | 0.38***              | 0.46**               |
| mg/dL   | (95%CI<br>0.40-0.87) | (95%CI<br>0.53-1.25) | (95%CI<br>0.55-1.46) | (95%CI<br>0.21-0.58) | (95%CI<br>0.22-0.71) | (95%CI<br>0.26-0.82) | (95%CI<br>0.33-0.93) | (95%CI<br>0.35-1.19) | (95%CI<br>0.41-1.46) | (95%CI<br>0.22-0.51) | (95%CI<br>0.24-0.62) | (95%CI<br>0.27-0.79) |
| >229    | 0.44***              | 0.53**               | 0.57*                | 0.51**               | 0.57*                | 0.65                 | 0.44***              | 0.47**               | 0.55*                | 0.30***              | 0.28***              | 0.34**               |
| mg/dL   | (95%CI<br>0.30-0.66) | (95%CI<br>0.35-0.81) | (95%CI<br>0.35-0.93) | (95%CI<br>0.34-0.77) | (95%CI<br>0.34-0.97) | (95%CI<br>0.38-1.11) | (95%CI<br>0.28-0.68) | (95%CI<br>0.28-0.78) | (95%CI<br>0.32-0.95) | (95%CI<br>0.20-0.46) | (95%CI<br>0.15-0.52) | (95%CI<br>0.17-0.65) |
| P-trend | <0.001               | <0.007               | <0.042               | <0.001               | <0.009               | <0.026               | <0.001               | <0.01                | <0.043               | <0.001               | <0.001               | <0.001               |

DDST(Digit Symbol Substitution Test); CERAD(Consortium to Establish a Registry for Alzheimer's Disease); Calculated using binary logistic regression; Reference (Ref.); Model 2 adjusted for age, education level, body mass index (BMI), marriage status, Ratio of family income to poverty and race; Model 3 adjusted for age and race, educational level, marriage status, Ratio of family income to poverty, body mass index (BMI), drinking status, smoking status, hypertension, and diabetes.\*  $P < 0.05$ ; \*\*  $P < 0.01$ ; \*\*\*  $P < 0.001$
